# Supplementary material
Source: Springer Nature journal article supplement (https://www.springermedizin.de/resource/supplementary/12931_2011_1168_MOESM2_ESM.pdf/9425444)

a) Week 8 PM

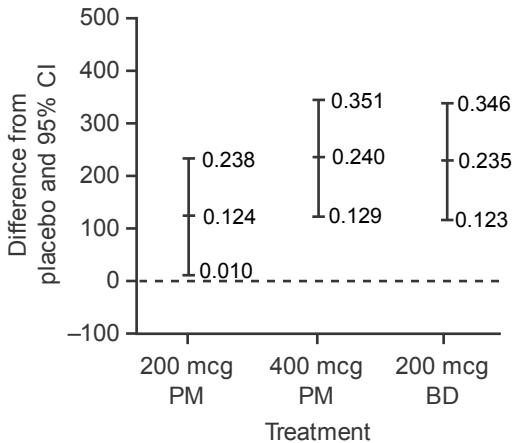

b) Week 8 AM

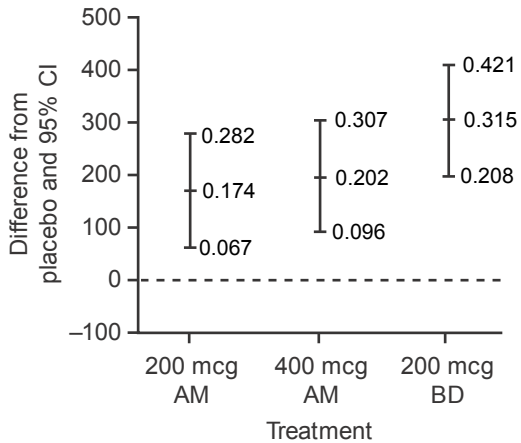

Supplement: MOESM2 [file 9425444]
